# Supplementary material
Source: MDPI journal article supplement (https://www.mdpi.com/2227-9717/8/11/1463)

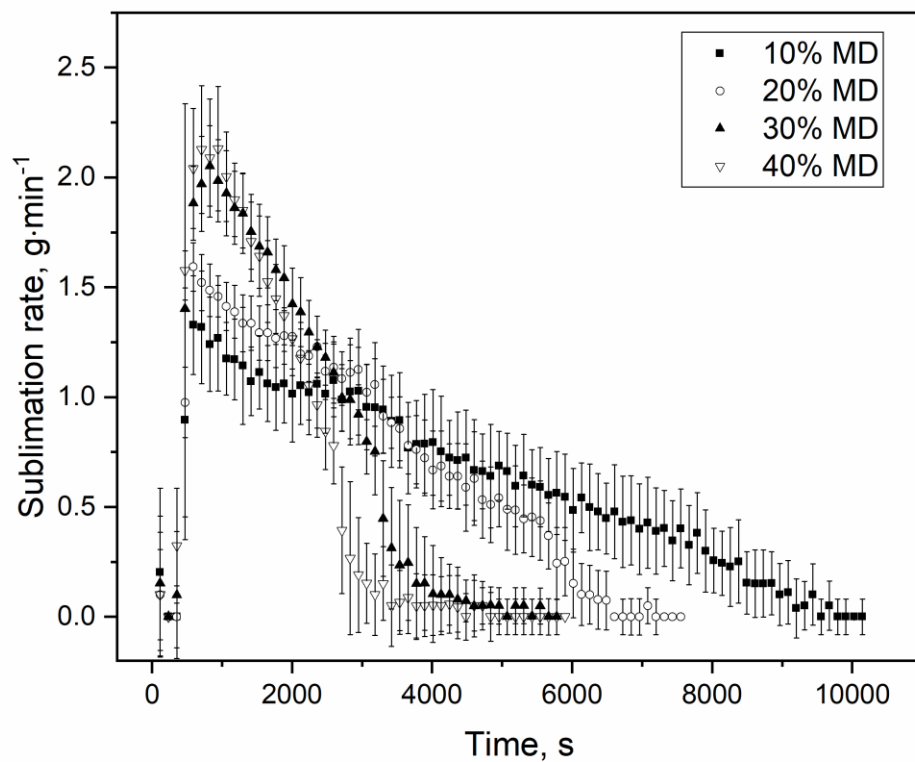

Figure S1. Sublimation rate of foams with MD content between 10 – 40%.

Supplement: s1 [file s1]
